# Supplementary material
Source: PubMed Central journal article supplement (PMC4633831)
Supplement: ncomms9533-s1.pdf [file ncomms9533-s1.pdf]

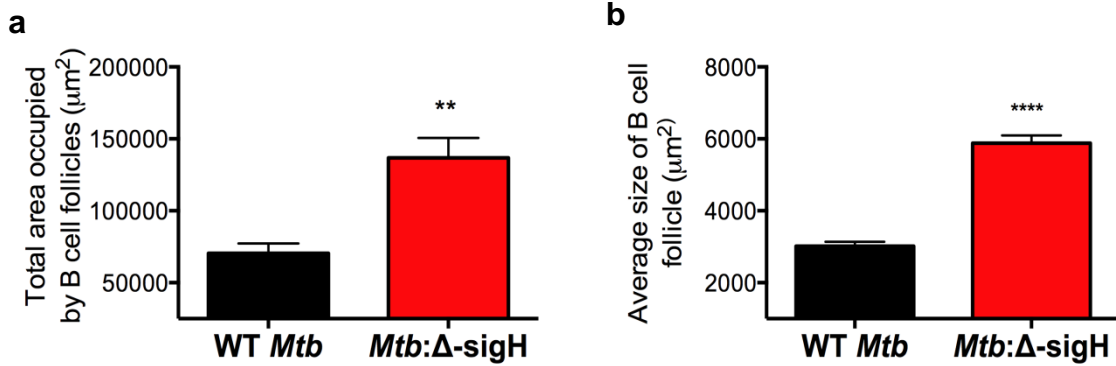

**Supplemental Figure 1.** iBALT formation by *Mtb* $\Delta$ *sigH* immunization. Lung granulomas arising from infection with *Mtb* exhibit significantly reduced iBALT response relative to those from a comparable infection with *Mtb* $\Delta$ *sigH*. (1) (a) Total area occupied by iBALT follicles in  $\mu\text{m}^2$  in the two different groups of animals and (b) the average size of B cell follicles in  $\mu\text{m}^2$  in the two different groups. Data from multiple lesions from six different animals was used to generate averages and statistical significance as described earlier (2), using a student's *t*-test in GraphPad Prism (a-b) \*\*  $p < 0.01$ , \*\*\*\*  $p < 0.0001$ .

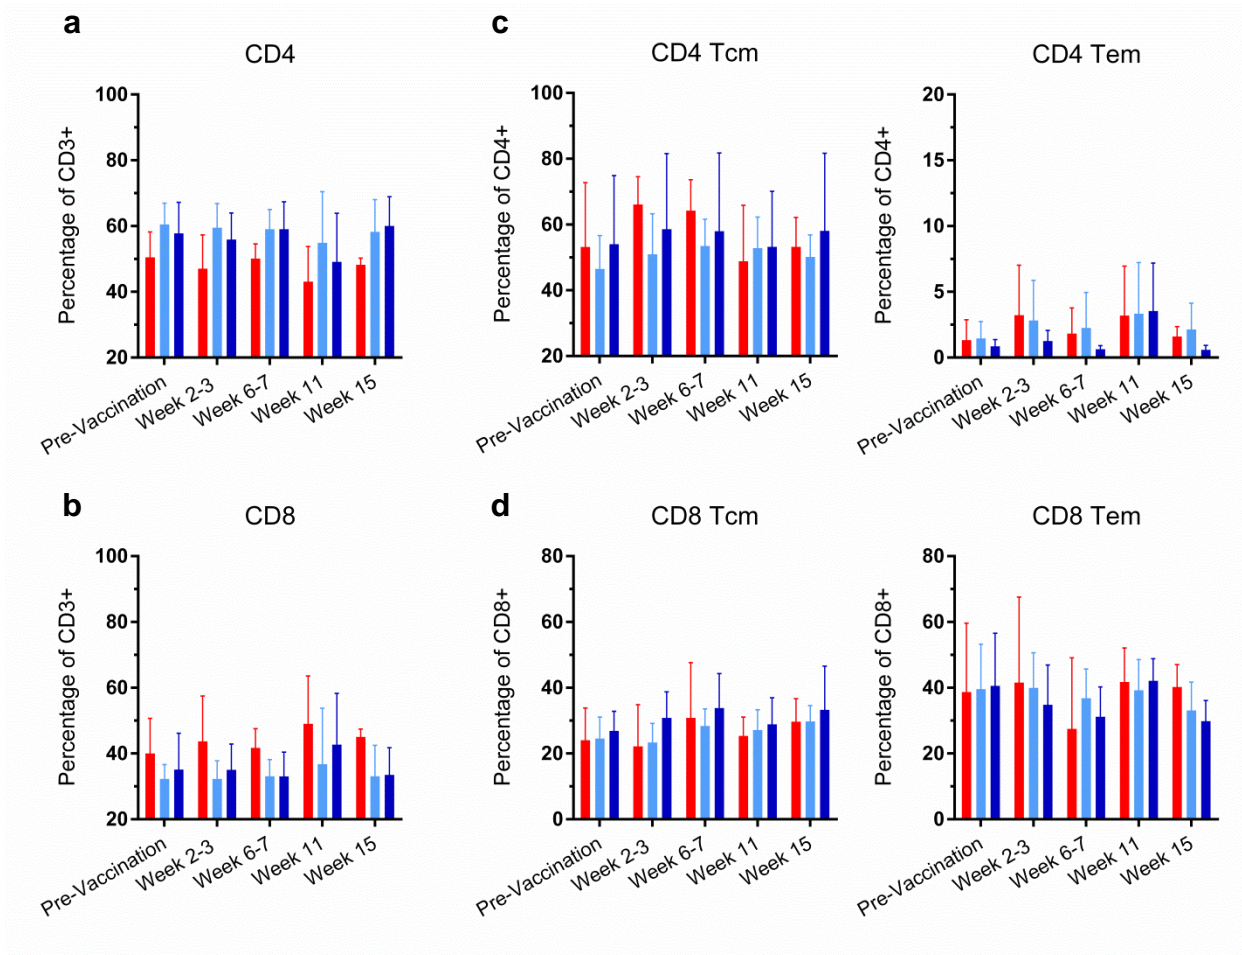

**Supplementary Figure 2.** Frequency of immune cells found in the periphery throughout the study. Frequency of circulating (A) CD4<sup>+</sup> T cells and (B) CD8<sup>+</sup> T cells; (C) CD4<sup>+</sup> T<sub>CM</sub> and T<sub>EM</sub> cells and of (D) CD8<sup>+</sup> T<sub>CM</sub> and T<sub>EM</sub> cells in groups of unvaccinated (red), BCG-vaccinated (light blue) and Mtb $\Delta$ sigH-vaccinated (dark blue) animals. No statistical significance as determined using Two-way ANOVA. Data are means  $\pm$  S.D.

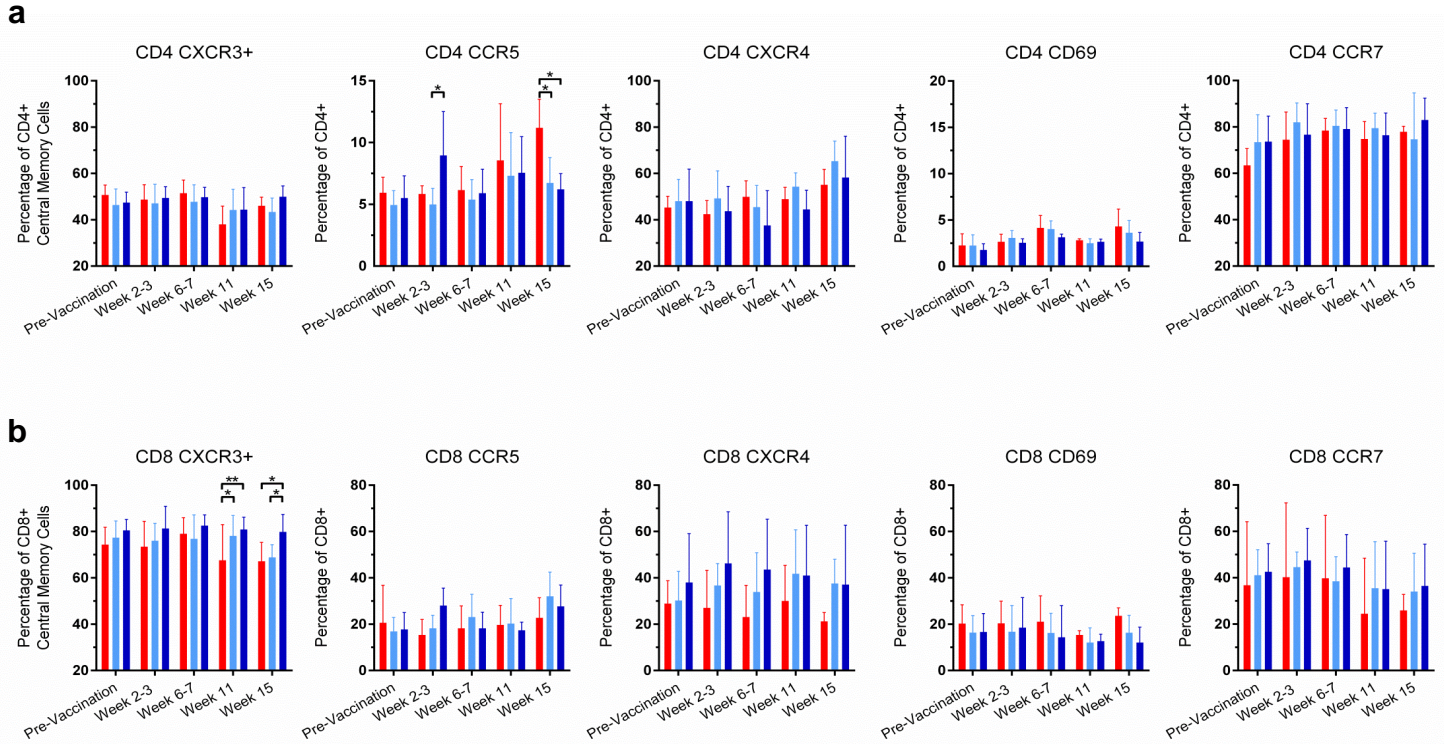

**Supplementary Figure 3.** Functional phenotype of immune cells found in the periphery throughout the study. Frequency of functional phenotype, determined by chemokine receptors CXCR3, CCR5, CXCR4, and CCR7 and activation maker CD69, circulating **(A)** CD4<sup>+</sup> T cells and **(B)** CD8<sup>+</sup> T cells in groups of unvaccinated (**red**), BCG-vaccinated (**light blue**) and MtbΔsigH-vaccinated (**dark blue**) animals. \*P < 0.05, \*\*P < 0.01, \*\*\*P < 0.001, \*\*\*\*P < 0.0001 using two-way ANOVA. Data are means ± S.D

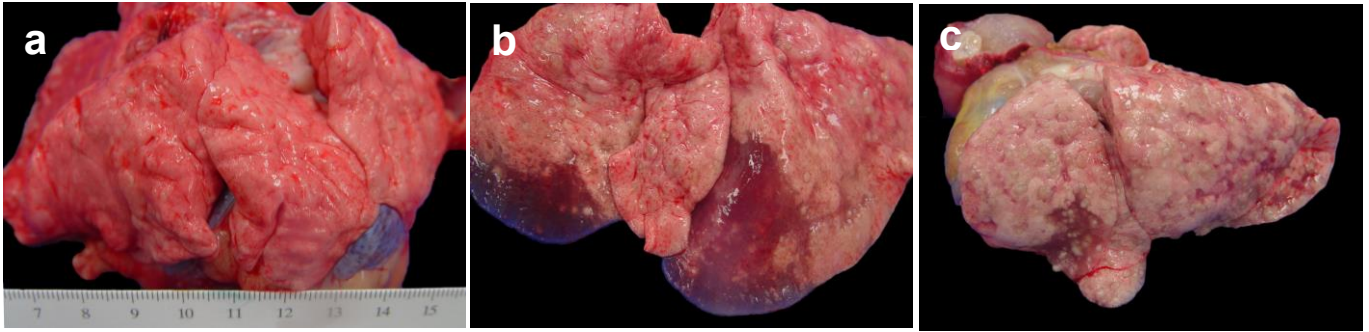

**Supplementary Figure 4.** Gross and histopathology of lung samples from representative animals of the three groups. *Mtb* $\Delta$ *sigH* vaccinated (**a**), BCG-vaccinated (**b**) and Unvaccinated (**c**). Gross images of lung were edited by altering the background to solid black, cropping out the animal label as well as most or all of the empty space around the tissue, and then enlarging by 2x.

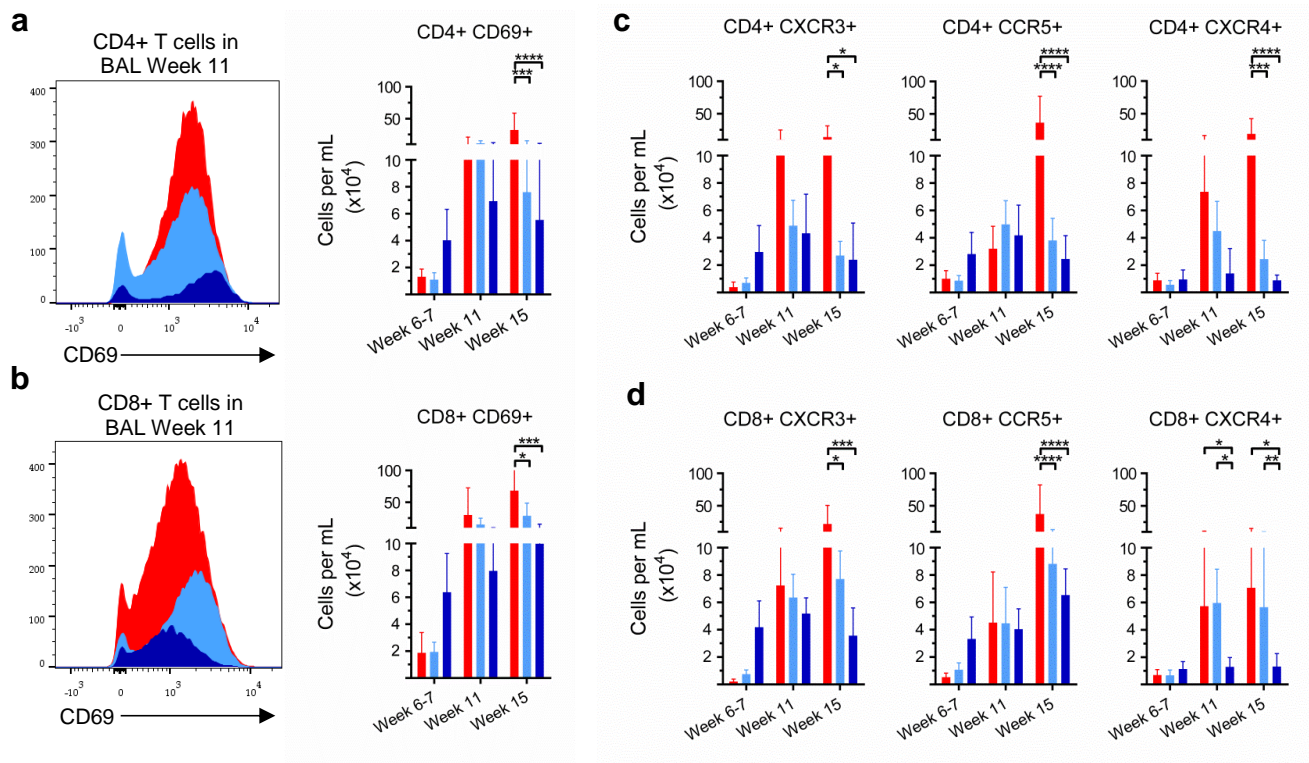

**Supplementary Figure 5.**

(a,b) Representative histogram of absolute cell count at week 15 of CD4<sup>+</sup>CD69<sup>+</sup> (a) and CD8<sup>+</sup>CD69<sup>+</sup> (b) T cells and their numbers after challenge in BAL. (c,d) Absolute count of cells per mL of BAL at different stages of infection of phenotypic markers CXCR3, CCR5, and CXCR4 in CD4<sup>+</sup> (c) and CD8<sup>+</sup> (d) T cells. \*P < 0.05 \*\*P < 0.01, \*\*\*P < 0.001, \*\*\*\*P < 0.0001 using two-way ANOVA. Data are means  $\pm$  S.D. Unvaccinated (red), BCG-vaccinated (light blue) and Mtb $\Delta$ sigH-vaccinated (dark blue).

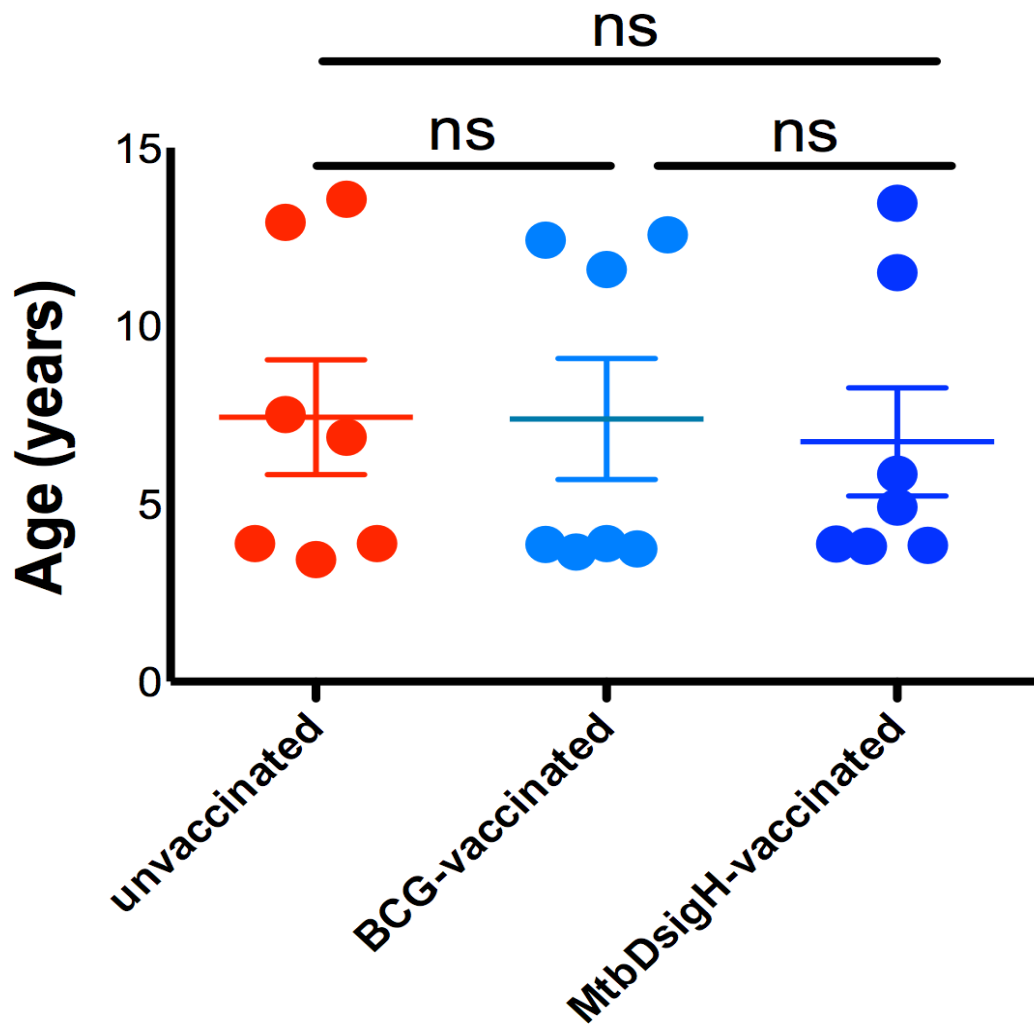

**Supplementary Figure 6.**

Age in years of macaques on the study and their representative distribution into the three different subject groups: unvaccinated (**red**), BCG-vaccinated (**light blue**) and *MtbΔsigH*-vaccinated (**dark blue**). There was no statistically significant difference in the average age of the animals in any of the groups, which were 7.42 years (unvaccinated), 7.38 years (BCG-vaccinated) and 6.75 years (*MtbΔsigH*-vaccinated).

**Supplemental Table 1.**

| Animal ID | Vaccination group | Time-to-humane-euthanasia (days from vaccination) | TST (pre-vaccination) | TST (post-vaccination) | TST (post-challenge) |
|-----------|-------------------|---------------------------------------------------|-----------------------|------------------------|----------------------|
| GK87      | Unvaccinated      | 38                                                | NNN                   | NNN                    | PPP                  |
| CL10      | Unvaccinated      | 51                                                | NNN                   | NNN                    | PPP                  |
| DF30      | Unvaccinated      | 34                                                | NNN                   | NNN                    | PPP                  |
| II46      | Unvaccinated      | 31                                                | NNN                   | NNN                    | PPP                  |
| II43      | Unvaccinated      | 59                                                | NNN                   | NNN                    | PPP                  |
| IL11      | Unvaccinated      | 42                                                | NNN                   | NNN                    | PPP                  |
| GI89      | Unvaccinated      | 59                                                | NNN                   | NNN                    | PPP                  |
| CR57      | BCG               | 51                                                | NNN                   | PPP                    | PPP                  |
| EA97      | BCG               | NA                                                | NNN                   | PPP                    | PPP                  |
| IL33      | BCG               | 39                                                | NNN                   | PPP                    | PPP                  |
| IJ42      | BCG               | 44                                                | NNN                   | PPP                    | PPP                  |
| II21      | BCG               | 46                                                | NNN                   | PPP                    | PPP                  |
| HE06      | BCG               | NA                                                | NNN                   | PPP                    | PPP                  |
| HN69      | BCG               | NA                                                | NNN                   | PPP                    | PPP                  |
| FM29      | <i>MtbΔsigH</i>   | NA                                                | NNN                   | PPP                    | PPP                  |
| DF44      | <i>MtbΔsigH</i>   | NA                                                | NNN                   | PPP                    | PPP                  |
| CK53      | <i>MtbΔsigH</i>   | NA                                                | NNN                   | PPP                    | PPP                  |
| IJ23      | <i>MtbΔsigH</i>   | NA                                                | NNN                   | PPP                    | PPP                  |
| IM73      | <i>MtbΔsigH</i>   | NA                                                | NNN                   | PPP                    | PPP                  |
| IN85      | <i>MtbΔsigH</i>   | NA                                                | NNN                   | PPP                    | PPP                  |
| II07      | <i>MtbΔsigH</i>   | NA                                                | NNN                   | PPP                    | PPP                  |

**Footnotes:**

1. All animals were infected with the *Mtb* CDC1551 strain via aerosol.
2. N and P indicate if the test was negative or positive. Macaques were assessed for positivity to tuberculin 24, 48 and 72 hrs after each administration. Hence NNN indicates that the animal was negative for TST at all three time points while PPP indicates a positive response was elicited at each of the three time points.
3. NA – not applicable; macaque survived till day 60, the duration of experimental protocol and was experimentally euthanized for collection of time-compared tissues.
